# Supplementary material
Source: PubMed Central journal article supplement (PMC7480886)
Supplement: NIHMS1604167-supplement-Supplementary_Tables.pdf [file NIHMS1604167-supplement-Supplementary_Tables.pdf]

## Supplementary Tables

**Supplementary Table 1.** NMR data of **BA**, **BX** and **BY**.

| ←  | <b>BA</b> |                                  | <b>BX</b> |                                  | <b>BY</b> |                                  |
|----|-----------|----------------------------------|-----------|----------------------------------|-----------|----------------------------------|
|    | C         | H (multiplicity, <i>J</i> in Hz) | C         | H (multiplicity, <i>J</i> in Hz) | C         | H (multiplicity, <i>J</i> in Hz) |
| 1  |           |                                  |           |                                  |           |                                  |
| 2  | 78.82     |                                  | 182.31    |                                  | 181.85    |                                  |
| 3  | 202.23    |                                  | 61.41     |                                  | 62.11     |                                  |
| 4  | 124.82    | 7.56 (d, 7.2)                    | 125.97    | 7.23 (d, 7.2)                    | 126.31    | 7.43 (d, 7.8)                    |
| 5  | 137.79    | 7.45 (t, 7.8)                    | 121.07    | 6.98 (dd, 7.2, 8.0)              | 120.85    | 6.99 (td, 7.8, 0.6)              |
| 6  | 119.35    | 6.81 (t, 7.8)                    | 128.06    | 7.19 (dd, 7.2)                   | 128.15    | 7.20 (td, 7.8, 0.6)              |
| 7  | 112.1     | 6.80 (d, 8.4)                    | 109.18    | 6.82 (d, 7.2)                    | 109.05    | 6.80 (d, 7.8)                    |
| 8  | 121.11    |                                  | 142.32    |                                  | 142.42    |                                  |
| 9  | 160.16    |                                  | 130.56    |                                  | 129.78    |                                  |
| 10 | 37.43     | 2.78 (d 15.6)<br>2.33 (d 15.6)   | 33.12     | 2.19 (d, 13.6)<br>2.85 (d, 14.4) | 33.63     | 2.12 (d, 15.6)<br>2.81 (d, 15.6) |
| 11 | 67.82     | -                                | 65.63     | -                                | 67.17     |                                  |
| 12 | 169.76    | -                                | 169.39    | -                                | 169.06    |                                  |
| 14 | 44.06     | 3.46, m                          | 43.39     | 3.40, m                          | 43.27     | 3.26, m                          |
| 15 | 25.1      | 2.04, m                          | 24.33     | 1.79, m<br>1.99, m               | 24.47     | 1.78, m<br>1.98, m               |
| 16 | 28.96     | 2.79, m<br>1.86, m               | 28.99     | 2.50, overlap                    | 28.45     | 1.79, m<br>2.47, m               |
| 17 | 69.52     |                                  | 68.07     |                                  | 69.1      |                                  |
| 18 | 29.17     | 1.91, m<br>1.87, m               | 29.42     | 1.94 (dd, 10.4, 10.4)<br>1.76, m | 27.97     | 1.93, m<br>1.64, m               |
| 19 | 55.7      | 2.4 (dd, 9.0, 7.8)               | 55.43     | 3.22 (dd, 8.8, 9.6)              | 50.04     | 3.16, overlapped                 |
| 20 | 172.43    |                                  | 173.08    |                                  | 172.52    |                                  |
| 22 | 48.44     |                                  | 45.10     |                                  | 46.86     |                                  |
| 23 | 19.93     | 1.14, s                          | 19.71     | 0.74, s                          | 20.42     | 1.00, s                          |
| 24 | 24.15     | 0.928, s                         | 23.25     | 0.72, s                          | 23.00     | 0.68, s                          |

**Supplementary Table 2.** NMR data of compound 7.

|    | 7      |                                  |                     |                                     |
|----|--------|----------------------------------|---------------------|-------------------------------------|
|    | C      | H (multiplicity, <i>J</i> in Hz) | HMBC                | <sup>1</sup> H- <sup>1</sup> H COSY |
| 1  |        |                                  |                     |                                     |
| 2  | 189.29 |                                  | 10, 23, 24          |                                     |
| 3  | 81.31  |                                  | 4,10                |                                     |
| 4  | 122.32 | 7.48 (d, 7.8)                    | 3, 5, 6             | 5                                   |
| 5  | 125.93 | 7.25 (t, 7.8)                    | 4, 6                | 4, 6                                |
| 6  | 129.21 | 7.37 (t, 7.8)                    | 5, 7                | 5, 7                                |
| 7  | 120.43 | 7.49 (d, 7.8)                    | 5, 6                | 6                                   |
| 8  | 151.98 |                                  | 6, 7                |                                     |
| 9  | 142.48 |                                  | 4, 10               |                                     |
| 10 | 38.12  | 2.69 (d, 15.6)<br>1.70 (d, 15.6) | 2, 3, 9, 11, 12, 19 |                                     |
| 11 | 61.17  | -                                | 10, 19              |                                     |
| 12 | 168.02 | -                                | 10, 14              |                                     |
| 14 | 43.93  | 3.33, m<br>3.28, m               | 12, 15, 16, 17      | 15                                  |
| 15 | 23.92  | 1.95, m<br>1.82, m               | 14, 16, 17          | 14, 16                              |
| 16 | 28.51  | 1.83, m<br>2.52, m               | 14, 15, 17, 18      | 15                                  |
| 17 | 66.64  |                                  | 14, 15, 16, 18      |                                     |
| 18 | 31.40  | 1.94, m<br>2.13 m                | 16, 17, 19, 22      | 19                                  |
| 19 | 49.89  | 1.92 (dd, 27.6, 5.4)             | 18, 11, 22          | 18                                  |
| 20 | 172.22 |                                  | 16, 18,             |                                     |
| 22 | 40.05  |                                  | 18, 19, 23, 24      |                                     |
| 23 | 19.47  | 1.37, s                          | 24, 22, 19, 2       |                                     |
| 24 | 27.02  | 1.21, s                          | 23, 22, 19, 2       |                                     |

**Supplementary Table 3.** Crystal data and structure refinement for compounds **BY**, **BX** and **15**

|                                      | <b>BY</b>                                                      | <b>BX</b>                                                     | <b>15</b>                                                     |
|--------------------------------------|----------------------------------------------------------------|---------------------------------------------------------------|---------------------------------------------------------------|
| Empirical formula                    | C <sub>21</sub> H <sub>23</sub> N <sub>3</sub> O <sub>3</sub>  | C <sub>42</sub> H <sub>48</sub> N <sub>6</sub> O <sub>7</sub> | C <sub>22</sub> H <sub>27</sub> N <sub>3</sub> O <sub>3</sub> |
| Formula weight                       | 365.42                                                         | 748.86                                                        | 381.46                                                        |
| Temperature                          | 85(2) K                                                        | 85(2) K                                                       | 99.99(10) K                                                   |
| Wavelength                           | 1.54184 Å                                                      | 1.54184 Å                                                     | 1.54184 Å                                                     |
| Crystal system,<br>space group       | Orthorhombic,<br>P2 <sub>1</sub> 2 <sub>1</sub> 2 <sub>1</sub> | Monoclinic, P2 <sub>1</sub>                                   | Monoclinic, P2 <sub>1</sub>                                   |
| Unit cell<br>dimensions              | a = 8.64880(6) Å<br>alpha = 90 deg.                            | a = 8.92445(7) Å<br>alpha = 90 deg.                           | a = 9.95650(10) Å<br>alpha = 90 deg.                          |
|                                      | b = 14.08640(10) Å<br>beta = 90 deg.                           | b = 16.05755(13) Å<br>beta = 97.6976(7) deg.                  | b = 9.19010(10) Å<br>beta = 109.0060(10)<br>deg.              |
|                                      | c = 14.60695(10) Å<br>gamma = 90 deg.                          | c = 13.03707(11) Å<br>gamma = 90 deg.                         | c = 11.01750(10) Å<br>gamma = 90 deg.                         |
| Volume                               | 1779.57(2) Å <sup>3</sup>                                      | 1851.44(3) Å <sup>3</sup>                                     | 953.157(17) Å <sup>3</sup>                                    |
| Z, Calculated<br>density             | 4, 1.364 Mg/m <sup>3</sup>                                     | 2, 1.343 Mg/m <sup>3</sup>                                    | 2, 1.329 Mg/m <sup>3</sup>                                    |
| Absorption<br>coefficient            | 0.749 mM <sup>-1</sup>                                         | 0.753 mM <sup>-1</sup>                                        | 0.719 mM <sup>-1</sup>                                        |
| F (000)                              | 776                                                            | 796                                                           | 408                                                           |
| Crystal size                         | 0.250 × 0.080 × 0.080<br>mm                                    | 0.110 × 0.100 × 0.070<br>mm                                   | 0.984 × 0.304 × 0.048<br>mm                                   |
| Theta range for<br>data collection   | 4.360 to 69.214 deg.                                           | 3.421 to 69.249 deg.                                          | 4.244 to 76.353 deg.                                          |
| Limiting indices                     | -10 ≤ h ≤ 10,<br>-17 ≤ k ≤ 16,<br>-17 ≤ l ≤ 17                 | -10 ≤ h ≤ 10,<br>-18 ≤ k ≤ 19,<br>-15 ≤ l ≤ 15                | -12 ≤ h ≤ 12,<br>-11 ≤ k ≤ 11,<br>-12 ≤ l ≤ 13                |
| Reflections<br>collected / unique    | 27067 / 3304 [R(int)<br>= 0.0525]                              | 28204 / 6550 [R(int) =<br>0.0504]                             | 17458 / 3824 [R(int) =<br>0.0336]                             |
| Completeness to<br>theta = 67.684    | 99.80%                                                         | 99.90%                                                        | 99.80%                                                        |
| Absorption<br>correction             | Semi-empirical from<br>equivalents                             | Semi-empirical from<br>equivalents                            | Semi-empirical from<br>equivalents                            |
| Max. and min.<br>transmission        | 1.00000 and 0.81488                                            | 1.00000 and 0.83164                                           | 1.00000 and 0.60142                                           |
| Refinement<br>method                 | Full-matrix<br>least-squares on F <sup>2</sup>                 | Full-matrix<br>least-squares on F <sup>2</sup>                | Full-matrix<br>least-squares on F <sup>2</sup>                |
| Data / restraints /<br>parameters    | 3304 / 0 / 254                                                 | 6550 / 1 / 524                                                | 3824 / 37 / 277                                               |
| Goodness-of-fit on<br>F <sup>2</sup> | 1.045                                                          | 1.057                                                         | 1.065                                                         |
| Final R indices                      | R1 = 0.0274, wR2 =                                             | R1 = 0.0337, wR2 =                                            | R1 = 0.0275, wR2 =                                            |

|                              |                                    |                                    |                                    |
|------------------------------|------------------------------------|------------------------------------|------------------------------------|
| $[I > 2\sigma(I)]$           | 0.0715                             | 0.0872                             | 0.0687                             |
| R indices (all data)         | R1 = 0.0277, wR2 =<br>0.0719       | R1 = 0.0351, wR2 =<br>0.0900       | R1 = 0.0302, wR2 =<br>0.0699       |
| Absolute structure parameter | 0.00(6)                            | 0.05(10)                           | 0.01(7)                            |
| Extinction coefficient       | n/a                                | n/a                                | 0.0111(10)                         |
| Largest diff. peak and hole  | 0.221 and -0.191 e.A <sup>-3</sup> | 0.655 and -0.175 e.A <sup>-3</sup> | 0.248 and -0.156 e.A <sup>-3</sup> |
| Hooft parameters             | 0.00(5)                            | 0.04(7)                            | 0.00(6)                            |

**Supplementary Table 4.** HPLC integrated peak areas and the calculated ratios of Brevianamide derivatives based on authentic standards.

| <b>Standard</b>            | <b>BA</b>            | <b>7</b>                    | <b>BX</b>                 | <b>BY</b>                  |
|----------------------------|----------------------|-----------------------------|---------------------------|----------------------------|
| <b>Peak area</b><br>/ 1 mM | 22950830             | 12386848                    | 6650753                   | 6820322                    |
| <b>Peak area (230 nm)</b>  |                      |                             |                           |                            |
| <b>Product</b>             | <i>Pb</i> -WT        | <i>Pb</i> - <i>bvnE</i> -KO | <i>Ao</i> - <i>bvnBCD</i> | <i>Ao</i> - <i>bvnBCDE</i> |
| <b>BA</b>                  | 6070509              | 1645891                     | 89398                     | 1135720                    |
| <b>BB</b>                  | 385483               | 1512301                     | 62211                     | 145886                     |
| <b>7</b>                   | 0                    | 5656029                     | 170993                    | 0                          |
| <b>BX</b>                  | 0                    | 1740695                     | 44157                     | 0                          |
| <b>BY</b>                  | 0                    | 4145174                     | 106020                    | 0                          |
| <b>Peak area (404 nm)</b>  |                      |                             |                           |                            |
| <b>Product</b>             | <i>Pb</i> -WT        | <i>Pb</i> - <i>bvnE</i> -KO | <i>Ao</i> - <i>bvnBCD</i> | <i>Ao</i> - <i>bvnBCDE</i> |
| <b>BA</b>                  | 422582               | 32811                       | 2784                      | 62595                      |
| <b>BB</b>                  | 37730                | 38626                       | 2608                      | 7441                       |
| ratio                      | 11:1                 | 1:1                         | 1:1                       | 8:1                        |
| <b>BA:BB:7:BX:BY</b>       |                      |                             |                           |                            |
| ratio                      | <i>Pb</i> -WT        | <i>Pb</i> - <i>bvnE</i> -KO | <i>Ao</i> - <i>bvnBCD</i> | <i>Ao</i> - <i>bvnBCDE</i> |
|                            | <b>BA:BB:7:BX:BY</b> |                             |                           |                            |
|                            | 11:1:0:0:0           | 1:1:7:5:9                   | 1:1:5:2:6                 | 8:1:0:0:0                  |

**Supplementary Table 5.** NMR data of compounds **15**, **16** and **17**.

|        | <b>15</b> |                                              | <b>16</b> |                                            | <b>17</b> |                                  |
|--------|-----------|----------------------------------------------|-----------|--------------------------------------------|-----------|----------------------------------|
|        | C         | H (multiplicity, <i>J</i> in Hz)             | C         | H (multiplicity, <i>J</i> in Hz)           | C         | H (multiplicity, <i>J</i> in Hz) |
| 1      |           |                                              |           |                                            |           |                                  |
| 2      | 191.57    |                                              | 70.22     |                                            | 178.77    |                                  |
| 3      | 86.32     |                                              | 201.52    |                                            | 54.57     |                                  |
| 4      | 123.25    | 7.45 (d, 7.8)                                | 123.2     | 7.22 (d, 7.8)                              | 128.73    | 7.05 (d, 7.8)                    |
| 5      | 125.3     | 7.14 (dd, 7.8, 1.2)                          | 116.78    | 6.56, m                                    | 119.52    | 6.84 (t, 7.2)                    |
| 6      | 129.12    | 7.31 (dd, 7.8, 1.2)                          | 136.4     | 7.31 (ddd, 8.4, 7.2, 1.2)                  | 127.55    | 7.11 (t, 7.2)                    |
| 7      | 120.2     | 7.41 (d, 7.8)                                | 111.18    | 6.82 (d, 8.4)                              | 108.66    | 6.71 (d, 7.8)                    |
| 8      | 141.69    |                                              | 120.13    |                                            | 143.31    |                                  |
| 9      | 151.64    |                                              | 161.05    |                                            | 128.73    |                                  |
| 10     | 34.32     | 3.12 (dd, 6.6, 15.6)<br>1.8 (dd, 3.0, 15.6)  | 32.69     | 2.47 (dd, 4.8, 15.6)<br>2.67 (dd, 3, 15.0) | 30.91     | 2.939, m<br>2.55 (dd, 6, 16.2)   |
| 11     | 56.6      | 4.72                                         | 59.46     | 3.9                                        | 59.99     | 3.97                             |
| 12     | 165.92    |                                              | 163.57    |                                            | 162.56    |                                  |
| 14     | 45.35     | 3.41, m                                      | 44.79     | 3.23 (td, 9.6, 3.6)<br>3.73, m             | 43.7      | 3.19 (dt, 11.4, 8.4)<br>2.94, m  |
| 15     | 22.01     | 1.85, m                                      | 20.74     | 1.67, m                                    | 20.18     | 1.51, m<br>1.4, m                |
| 16     | 28.21     | 2.18, m<br>1.87, m                           | 28.15     | 1.68, m<br>0.47, m                         | 28.11     | 1.72, m<br>0.45 m                |
| 17     | 58.29     | 4.3 (t, 4.3)                                 | 58.04     | 3.77 (ddd, 1.8, 5.4, 11.4)                 | 57.95     | 3.69 (dd, 6.0, 12.0)             |
| 18     | 168.09    |                                              | 165.95    |                                            | 165.8     |                                  |
| 19-NMe | 30.11     | 2.36, s                                      | 32.69     | 2.6, s                                     | 32.81     | 2.76, s                          |
| 20     | 42.8      |                                              | 44.79     |                                            | 42.72     |                                  |
| 21     | 145.12    | 6.31 (dd, 17.4, 10.2)                        | 142.11    | 6.02 (dd, 10.8, 16.8)                      | 143.06    | 6.03, m                          |
| 22     | 111.93    | 5.15 (dd, 0.6, 10.2)<br>5.05 (dd, 0.6, 10.2) | 113.5     | 5.1 (d, 17.4)<br>5.0 (d, 12.0)             | 113.52    | 5.03 (d, 10.8)<br>4.91 (d, 17.4) |
| 23     | 26.01     | 1.52, s                                      | 21.16     | 0.92, s                                    | 20.87     | 0.86, s                          |
| 24     | 27.53     | 1.47, s                                      | 21.16     | 0.95, s                                    | 21.75     | 0.96, s                          |

**Supplementary Table 6.** Selectivity calculation results of different Brevianamide derivatives.

| Compound type         | Product             | Stereochemistry                                                                     | Relative G of different TS (kcal/mol) | Probability                      | Selectivity   |
|-----------------------|---------------------|-------------------------------------------------------------------------------------|---------------------------------------|----------------------------------|---------------|
| 3-hydroxy indolenines | 7                   | 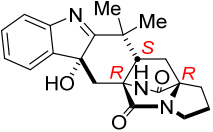   | 0.00                                  | 0.521                            | 7: 52.1%      |
|                       | 8 (converted to BY) |    | 0.19<br>1.92                          | 0.375<br>0.020                   | (BY)<br>39.5% |
|                       | 9 (converted to BX) |    | 1.62<br>2.47                          | 0.034<br>0.008                   | (BX)<br>4.2%  |
|                       | 22                  |   | 1.49                                  | 0.042                            | 4.2%          |
| 3-spiro-ψ-indoxyls    | BA                  |  | 0.00<br>1.52<br>0.72                  | 0.706<br>0.055<br>0.210          | 97.1%         |
|                       | BB                  |  | 2.07<br>3.51<br>2.82                  | 0.022<br>0.002<br>0.006          | 2.9%          |
|                       | 23                  |  | 8.67<br>9.14<br>7.91                  | 0.000<br>0.000<br>0.000          | 0.0%          |
|                       | 24                  |  | 8.38<br>15.71<br>10.51<br>9.27        | 0.000<br>0.000<br>0.000<br>0.000 | 0.0%          |

**Supplementary Table 7.** Data collection and refinement statistics for ligand-free BvnE.

| <b>Parameter</b>                       |                             |
|----------------------------------------|-----------------------------|
| Wavelength (Å)                         | 1.033                       |
| Resolution range                       | 36.72-1.78 (1.84-1.78)      |
| Space group                            | <i>P</i> 3 <sub>2</sub> 2 1 |
| Unit cell (Å)                          | 105.6×105.6×61.6            |
| Total reflections                      | 761908 (69001)              |
| Unique reflections                     | 38383 (3783)                |
| Multiplicity                           | 19.9 (18.2)                 |
| Completeness (%)                       | 99.9 (99.5)                 |
| Mean I/sigma(I)                        | 20.71 (2.60)                |
| Wilson B-factor                        | 22.37                       |
| R <sub>merge</sub>                     | 0.129 (0.950)               |
| R <sub>meas</sub>                      | 0.132 (0.978)               |
| CC <sub>1/2</sub>                      | 0.999 (0.886)               |
| Reflections used in refinement         | 38359 (3780)                |
| Reflections used for R <sub>free</sub> | 2000 (196)                  |
| R <sub>work</sub>                      | 0.182 (0.267)               |
| R <sub>free</sub>                      | 0.203 (0.316)               |
| Number of non-hydrogen atoms           | 2604                        |
| macromolecules                         | 2290                        |
| Ligands                                | 25                          |
| Solvent                                | 289                         |
| RMS(bonds)                             | 0.006                       |
| RMS(angles)                            | 0.82                        |
| Ramachandran favored (%)               | 99.3                        |
| Ramachandran allowed (%)               | 0.7                         |
| Ramachandran outliers (%)              | 0.0                         |
| Average B-factor                       | 26.15                       |
| macromolecules                         | 25.07                       |
| Ligands                                | 37.70                       |
| Solvent                                | 33.70                       |



**Supplementary Table 8.** Strains and vectors used in this study.

| Stains/vectors                                           | Genotype                                                                                            | Description                                              |
|----------------------------------------------------------|-----------------------------------------------------------------------------------------------------|----------------------------------------------------------|
| <i>Penicillium brevicompactum</i> NRRL 864 ( <i>Pb</i> ) | Wild type                                                                                           |                                                          |
| <i>Pb-bvnB</i> -KO                                       |                                                                                                     | The <i>bvnB</i> knockout mutant of <i>Pb</i>             |
| <i>Pb-bvnC</i> -KO                                       |                                                                                                     | The <i>bvnC</i> knockout mutant of <i>Pb</i>             |
| <i>Pb-bvnD</i> -KO                                       |                                                                                                     | The <i>bvnD</i> knockout mutant of <i>Pb</i>             |
| <i>Pb-bvnE</i> -KO                                       |                                                                                                     | The <i>bvnE</i> knockout mutant of <i>Pb</i>             |
| <i>Aspergillus oryzae</i> NSAR1 ( <i>Ao</i> )            | <i>niad</i> <sup>-</sup> , <i>sC</i> <sup>-</sup> , $\Delta$ <i>argB</i> , <i>adeA</i> <sup>-</sup> | Heterologous gene expression host                        |
| <i>Ao-bvnA</i>                                           |                                                                                                     | Heterologous expression of <i>bvnA</i> in <i>Ao</i>      |
| <i>Ao-bvnC</i>                                           |                                                                                                     | Heterologous expression of <i>bvnC</i> in <i>Ao</i>      |
| <i>Ao-bvnCDE</i>                                         |                                                                                                     | Heterologous expression of <i>bvnCDE</i> in <i>Ao</i>    |
| <i>Ao-bvnBC</i>                                          |                                                                                                     | Heterologous expression of <i>bvnBC</i> in <i>Ao</i>     |
| <i>Ao-bvnBCE</i>                                         |                                                                                                     | Heterologous expression of <i>bvnBCE</i> in <i>Ao</i>    |
| <i>Ao-bvnBCD</i>                                         |                                                                                                     | Heterologous expression of <i>bvnBCD</i> in <i>Ao</i>    |
| <i>Ao-bvnBCDE</i>                                        |                                                                                                     | Heterologous expression of <i>bvnBCDE</i> in <i>Ao</i>   |
| <i>Ao-bvnD</i>                                           |                                                                                                     | Heterologous expression of <i>bvnD</i> in <i>Ao</i>      |
| <i>Ao-bvnDE</i>                                          |                                                                                                     | Heterologous expression of <i>bvnDE</i> in <i>Ao</i>     |
| <i>E. coli</i> DH5 $\alpha$                              |                                                                                                     | For general molecular cloning                            |
| <i>E. coli</i> BL21(DE3)                                 |                                                                                                     | For protein overexpression                               |
| <i>E. coli</i> BL21(DE3) pRARE2                          |                                                                                                     | For BvnE expression for crystallization                  |
| pRSF-hyg                                                 |                                                                                                     | Backbone vector for gene knockout                        |
| pTAex3- <i>bvnA</i>                                      |                                                                                                     | For heterologous expression of <i>bvnA</i> in <i>Ao</i>  |
| pUARA2- <i>bvnB</i>                                      |                                                                                                     | For heterologous expression of <i>bvnB</i> in <i>Ao</i>  |
| pAdeA2- <i>bvnBD</i>                                     |                                                                                                     | For heterologous expression of <i>bvnBD</i> in <i>Ao</i> |
| pAdeA2- <i>bvnC</i>                                      |                                                                                                     | For heterologous expression of <i>bvnC</i> in <i>Ao</i>  |
| pUSA2- <i>bvnE</i>                                       |                                                                                                     | For heterologous expression of <i>bvnE</i> in <i>Ao</i>  |
| pET28b- <i>bvnB</i>                                      |                                                                                                     | For expression of BvnB in <i>E. coli</i>                 |
| pET28b- <i>bvnC</i>                                      |                                                                                                     | For expression of BvnC in <i>E. coli</i>                 |
| pET28b- <i>bvnE</i>                                      |                                                                                                     | For expression of BvnE in <i>E. coli</i>                 |

**Supplementary Table 9.** Primers used in this study.

| <b>Vector/primers</b> | <b>Sequence</b>                                       | <b>Description</b>                                   |
|-----------------------|-------------------------------------------------------|------------------------------------------------------|
| Hyg-F                 | CTGCTCCATACAAGCCAACC                                  | For amplifying knockout split fragments              |
| Hyg-R                 | GATGTAGGAGGGCGTGGATAT<br>GTCCT                        | For amplifying knockout split fragments              |
| bvnB-up-F             | GCCTGCAGGTCGACAAGCTTCC<br>CTATCCCTAGAAGTGCCAGTAT      | For amplifying up arm of <i>bvnB</i> .               |
| bvnB-up-R             | AAACTACCGCATTAAAGCTTGT<br>TAATCATCTAGTCAACATCCTTC     | For amplifying up arm of <i>bvnB</i> .               |
| bvnB-down-F           | GTGGAGCGGCGTCGAGATCTGG<br>TTCAGCACAGTCTGATGATACG<br>T | For amplifying down arm of <i>bvnB</i>               |
| bvnB-down-R           | CCGATATCCAATTGAGATCTGCA<br>GCGGATACAACGAATACACTT      | For amplifying down arm of <i>bvnB</i>               |
| bvnB-anchor-F         | CACCGTTGTCCACCGAGATT                                  | For PCR verification of <i>bvnB</i> knockout mutants |
| bvnB-anchor-R         | CGTGAAGATGGGAACCCTGAT                                 | For PCR verification of <i>bvnB</i> knockout mutants |
| bvnB-in-F             | GTAGGTATGCCGATGGACT                                   | For PCR verification of <i>bvnB</i> knockout mutants |
| bvnB-in-R             | ATCCTGTGCCCTTTAGTGGT                                  | For PCR verification of <i>bvnB</i> knockout mutants |
| bvnC-up-F             | GCCTGCAGGTCGACAAGCTTTG<br>CCCATCATAACCATAACATCCT      | For amplifying up arm of <i>bvnC</i>                 |
| bvnC-up-R             | AAACTACCGCATTAAAGCTTAG<br>TAGAAGCATTGCGAATTTGAG       | For amplifying up arm of <i>bvnC</i>                 |
| bvnC-down-F           | GTGGAGCGGCGTCGAGATCTGA<br>TGTTGACTGTCCCAGTAAGAT<br>A  | For amplifying down arm of <i>bvnC</i>               |
| bvnC-down-R           | CCGATATCCAATTGAGATCTCGT<br>CTGATCCTTCAGTCGGTCTAG      | For amplifying down arm of <i>bvnC</i>               |
| bvnC-anchor-F         | TGAGACACCCAGGTCCGTAG                                  | For PCR verification of <i>bvnC</i> knockout mutants |
| bvnC-anchor-R         | TGCAAAGCCGCCACTCGTAA                                  | For PCR verification of <i>bvnC</i> knockout mutants |
| bvnC-in-F             | ACTTGGGCACGGGCCAGGAA                                  | For PCR verification of <i>bvnC</i> knockout mutants |
| bvnC-in-R             | GGCCCAGTGGTGGCAAGATA                                  | For PCR verification of <i>bvnC</i> knockout mutants |
| bvnD-up-F             | GCCTGCAGGTCGACAAGCTTTA<br>GTTCCAGATGATGGGCGAGGC       | For amplifying up arm of <i>bvnD</i>                 |
| bvnD-up-R             | AAACTACCGCATTAAAGCTTATT                               | For amplifying up arm of <i>bvnD</i>                 |

|                 |                                                                  |                                                                  |
|-----------------|------------------------------------------------------------------|------------------------------------------------------------------|
|                 | GTAACGGATTACTGGAAGGAAT                                           |                                                                  |
| bvnD-down-F     | GTGGAGCGGCGTCGAGATCTAA<br>TTTACTCGATGTAGCGCAACTG<br>A            | For amplifying down arm of <i>bvnD</i>                           |
| bvnD-down-R     | CCGATATCCAATTGAGATCTTCA<br>GCAAACCTTGACGCAGTAATCG                | For amplifying down arm of <i>bvnD</i>                           |
| bvnD-anchor-F   | CGTCAAGTCAGCCATACATAGC                                           | For PCR verification of <i>bvnD</i> knockout mutants             |
| bvnD-anchor-R   | GAAGACATAGGATAAGCGGAGT                                           | For PCR verification of <i>bvnD</i> knockout mutants             |
| bvnD-in-F       | TGTCAATCGGTATCGGTGGG                                             | For PCR verification of <i>bvnD</i> knockout mutants             |
| bvnD-in-R       | GAATTTGTCAGGCTCAGGGT                                             | For PCR verification of <i>bvnD</i> knockout mutants             |
| bvnE-up-F       | CGCCTGCAGGTCGACAGGCTGG<br>TGACCGTGCGAAAT                         | For amplifying up arm of <i>bvnE</i>                             |
| bvnE-up-R       | CGTTAGCAATTTAACTGTGATAA<br>ACTACCGCATTAACGAGGACTG<br>TAGGAGTAGGC | For amplifying up arm of <i>bvnE</i>                             |
| bvnE-down-F     | GGGCCTTGACATGTGCAGCCGG<br>TGGAGCGGCGTCGATAGCGATT<br>ACTGCGTCAAG  | For amplifying down arm of <i>bvnE</i>                           |
| bvnE-down-R     | GCCGATATCCAATTGACTACGG<br>CTGAGAAATACCAT                         | For amplifying down arm of <i>bvnE</i>                           |
| bvnE-anchor-F   | ACCTGGTGGACGGTAGCAAT                                             | For PCR verification of <i>bvnE</i> knockout mutants             |
| bvnE-anchor-R   | GCCATTTATTCAGCACCCAC                                             | For PCR verification of <i>bvnE</i> knockout mutants             |
| bvnE-in-F       | CAATCAAACGACAGGTCCCA                                             | For PCR verification of <i>bvnE</i> knockout mutants             |
| bvnE-in-R       | ACATCCCGTAGCAAAGTCCC                                             | For PCR verification of <i>bvnE</i> knockout mutants             |
| pUARA2-BvnB-F   | ATCGATTTGAGCTAGATGACTA<br>GGAACAATACCAT                          | For amplifying <i>bvnB</i> for pUARA2 insertion by infusion      |
| pUARA2-BvnB-R   | TAGTGCGGCCGCTAGCTACTCC<br>TGACGATATTTCC                          | For amplifying <i>bvnB</i> for pUARA2 insertion by infusion      |
| pAdeA2-BvnD-F   | AAGCTCCGGAATTCGAGCTCGG<br>TACCATGACCAAGGCCACCACC<br>CC           | For amplifying <i>bvnD</i> for pAdeA2 insertion by HiFi assembly |
| pAdeA2-BvnD-R   | GATCCCCGGTACCCTATATTTT<br>GACCTCCTCTTGTCGCCG                     | For amplifying <i>bvnD</i> for pAdeA2 insertion by HiFi assembly |
| pAdeA2-linker-F | GGTCAAATATAGGGTACCGG<br>GGATCTGTAGTAG                            | For amplifying linker from pAdeA2 for pAdeA2- <i>bvnBD</i> by    |

|                 |                                                            |                                                                             |
|-----------------|------------------------------------------------------------|-----------------------------------------------------------------------------|
|                 |                                                            | HiFi assembly                                                               |
| pAdeA2-linker-R | TTGACTTGGTCATGCTAGCTCA<br>AATCGATTCTGAATTC                 | For amplifying linker from pAdeA2 for pAdeA2- <i>bvnBD</i> by HiFi assembly |
| pAdeA2-BvnC-F   | GATTTGAGCTAGCATGACCAAG<br>TCAAACGAAGTC                     | For amplifying <i>bvnC</i> for pAdeA2 insertion by HiFi assembly            |
| pAdeA2-BvnC-R   | ACTACCCGGGTCAGTAGTGC GG<br>CCGCTAGCTCAGTTCTCCACG<br>GATAGG | For amplifying <i>bvnC</i> for pAdeA2 insertion by HiFi assembly            |
| pUSA2-BvnE-F    | AAGCTCCGGAATTCGAGCTCGG<br>TACCATGACGCTCAATCAAACG<br>AC     | For amplifying <i>bvnE</i> for pUSA2 insertion by HiFi assembly             |
| pUSA2-BvnE-R    | ATCCCCGGGTACCCTATATGGA<br>TGTCGATTCTGC                     | For amplifying <i>bvnE</i> for pUSA2 insertion by HiFi assembly             |
| BvnE Y109F      | GGCGGCATGTGGCCTTTTTGAG<br>AATGAGTACATGGTCGTA<br>CTTACC     | BvnE site specific mutagenesis                                              |
| BvnE R38A       | CAGACGCGATGGTCTCACACGC<br>CACCGAGGAATGTGTACGC              | BvnE site specific mutagenesis                                              |
| BvnE R49A       | ACGCGTCCC GCGCCGGCCTCGC<br>TTGGCTTTGCACCGCTAA              | BvnE site specific mutagenesis                                              |
| BvnE Y113F      | GTGGCCTTTATGAGAATGAGTT<br>CATGGTCGTA<br>CTTACCTTTAATG      | BvnE site specific mutagenesis                                              |
| BvnE E131A      | GACTTTGCTACGGGATGTTATC<br>GCGTTTGCAGATAGCGATTACT<br>GC     | BvnE site specific mutagenesis                                              |
| BvnE E131Q      | GACTTTGCTACGGGATGTTATC<br>CAGTTTGCAGATAGCGATTACT<br>GC     | BvnE site specific mutagenesis                                              |
| BvnE R38Q       | CAGACGCGATGGTCTCACACCA<br>GACCGAGGAATGTGTACGC              | BvnE site specific mutagenesis                                              |
